# Supplementary material for: Nano-biochar modulates the formation of iron plaque through facilitating iron-involved redox reactions on aquatic plant root surfaces
Source: Royal Society of Chemistry journal article supplement (doi:10.1039/d2en00032f), 2022-01-01
Supplement: d2en00032f1.pdf [file d2en00032f1.pdf]

## Supporting Information

### **Nano-biochar modulates the formation of iron plaque through facilitating iron-involved redox reactions on aquatic plant root surfaces**

Shiguo Gu <sup>a</sup>, Fei Lian <sup>b\*</sup>, Yaru Han <sup>a</sup>, Sarasadat Taherymoosavi <sup>c</sup>, David Mitchell <sup>d</sup>,  
Stephen Joseph <sup>c,e</sup>, Zhenyu Wang <sup>a\*</sup>, and Baoshan Xing <sup>f</sup>

<sup>a</sup> Institute of Environmental Processes and Pollution Control, and School of Environment and Civil Engineering, Jiangnan University, Wuxi 214122, China

<sup>b</sup> School of Energy and Environmental Engineering, Hebei University of Technology, Tianjin 300401, China

<sup>c</sup> School of Materials Science and Engineering, University of NSW, Kensington, NSW 2052, Australia

<sup>d</sup> Electron Microscopy Centre, AIIM Building, Innovation Campus, University of Wollongong, North Wollongong, NSW 2517, Australia

<sup>e</sup> Institute for Superconducting and Electronic Materials and School of Physics, University of Wollongong, NSW 2522, Australia

<sup>f</sup> Stockbridge School of Agriculture, University of Massachusetts, Amherst, Massachusetts 01003, United States

\*Corresponding authors:

Tel: +86 022-60435775; email: [lianfei2000@126.com](mailto:lianfei2000@126.com) (Fei Lian);

Tel: +86 0510 85911123; email: [wang0628@jiangnan.edu.cn](mailto:wang0628@jiangnan.edu.cn) (Zhenyu Wang)

Number of pages: 14

Number of Figures: 10

Number of Tables: 4

### **Text S1: The fractionation of nano-BC from bulk-BC suspension**

The BC powders were mixed with DI water to obtain BC suspensions and then were set quiescently for 2 h to make the majority of bulk-BC deposit. The upper layer of suspension was pipetted out and then refilled with DI water. This extraction procedure was repeated several times until the upper layer of suspension had negligible Tyndall effect. All the pipetted suspensions were combined and centrifuged at 10,000 rpm for 30 min. The supernatant after centrifugation was freeze-dried to obtain nano-BC.

### **Text S2: Electrochemical measurements of nano-BC**

Glassy carbon electrode (diameter 3 mm), platinum spiral wire, and Ag/AgCl (3 mol/L KCl) were used as working, counter, and reference electrodes, respectively. The cylinder (9 mL) was added phosphate buffer (0.1 mol/L KCl, pH = 7) and equilibrated to a desired redox potential. Subsequently, 100  $\mu$ L of stock solution (10 mmol/L) of the electron transfer mediators zwitterionic viologen 4,4'-bipyridinium-1,1'-bis(2-ethylsulfonate) (in MER) or 2,2'-azino-bis(3-ethylbenzothiazoline-6-sulfonic acid) diammonium salt (in MEO) were added to the cells, resulting in reductive and oxidative current peaks, respectively. After reattainment of constant background currents, 200  $\mu$ L of the nano-BC suspension (10 mg/L) were pipetted into the cells. The resulting reductive and oxidative current peaks were integrated to yield the electron accepting capacities (EAC) and donating capacities (EDC) (mmol e<sup>-</sup>/g) of the added nano-BCs. All the measurements were performed in triplicates.

### **Text S3: the plate-counting assays**

Rice seedlings with the same growth were transferred into 500 mL suspension of nano-

BC in the artificial rhizosphere pore water and followed by the addition of  $\text{FeSO}_4 \cdot 7\text{H}_2\text{O}$  (50 mg/L) stock solution to form IP along root surfaces and cultivated for 2 days. Bottles receiving only artificial rhizosphere pore water instead of BC suspension were used as control. After harvest, the rice roots were rinsed by DI water to remove root impurities, and then the microorganisms were collected by ultrasound (30 mins). Aliquots (0.1mL) of  $10^3$  or  $10^4$  dilutions of the washings from rice roots, prepared in sterile water, were evenly spread on Luria-Bertani medium (10 g/L NaCl, 10 g/L tryptone, and 5 g/L yeast extract). Each dilution scheme was executed in triplicate by completing three separate dilution experiments. After 72 h of incubation at  $30^\circ\text{C}$ , and plate counts were conducted on each dilution.

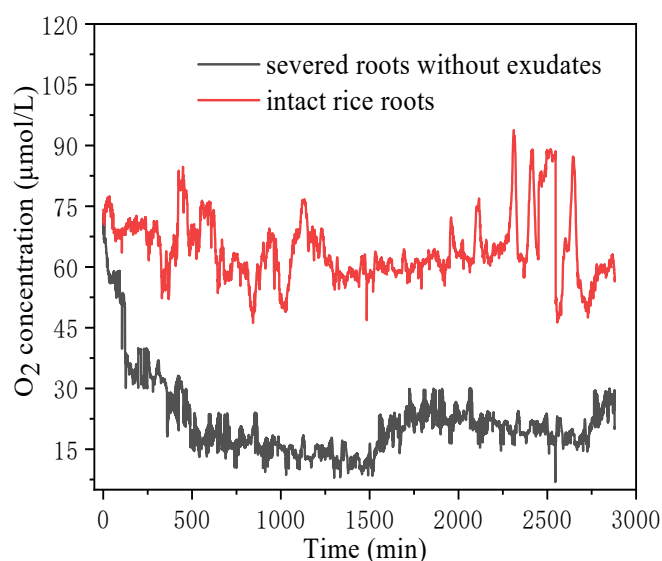

Fig. S1. Release of oxygen from the intact rice roots and severed roots without exudates. The data were indicative of the higher vitality of the intact rice roots.

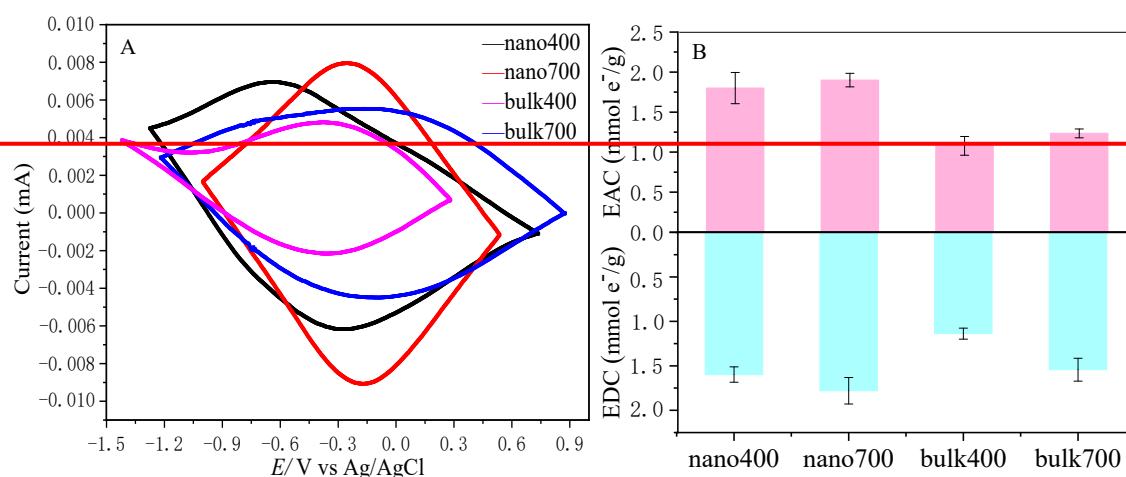

Fig. S2. Electrochemical characterization of bulk- and nano-BCs: (A) cyclic voltammetry of bulk- and nano-BCs prepared at 400 and 700 °C, respectively; and (B) electron accepting and donating capacity (EAC and EDC) of bulk- and nano-BCs on the basis of BC mass.

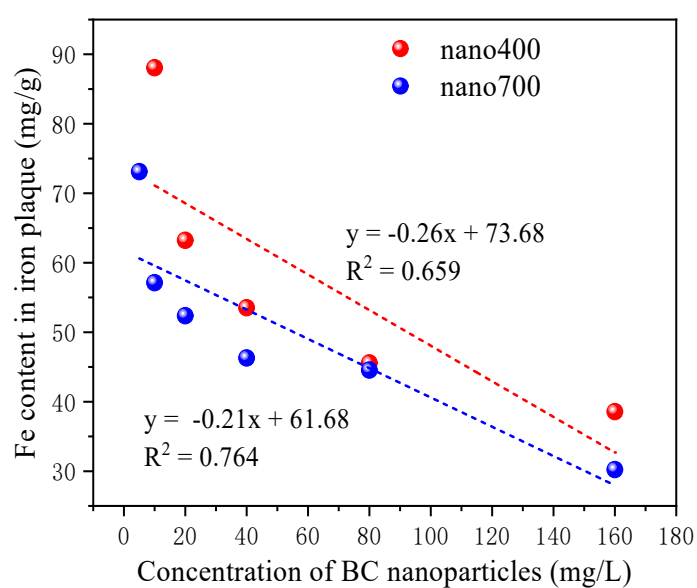

Fig. S3. The negative relationship between excess dosage of nano-BC and Fe content

in iron plaque on rice roots.

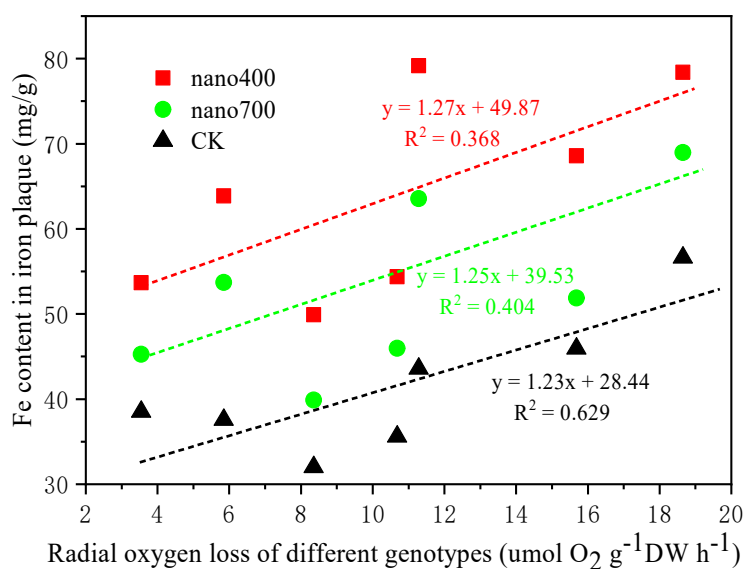

Fig. S4. Relationship between Fe content in plaque and the rate of radial oxygen loss of 7 rice genotypes in the presence and absence of nano-BCs, respectively. The concentration of Fe(II), nano400, and nano700 was 50 mg/L, 5.0 mg/L, and 2.5 mg/L, respectively. The tested rice genotypes included: 1#: Yueyou No.9113, Yueyang Institute of Agricultural Sciences, Hunan, China; 2#: Fupin Jiangsu academy of agricultural sciences, Nanjing, China; 3#: Zhongzao No.22, China National Rice Research Institute, Hangzhou, China; 4#: X24, Agro-Environmental protection Institute, Ministry of Agriculture; 5#: R705, Anhui Academy of Academy of Agricultural Sciences, Hefei, China; 6#: Nan Jing No.9108, Jiangsu academy of agricultural sciences, Nanjing, China; 7#: Hunan Hybrid rice research center, Changsha, China.

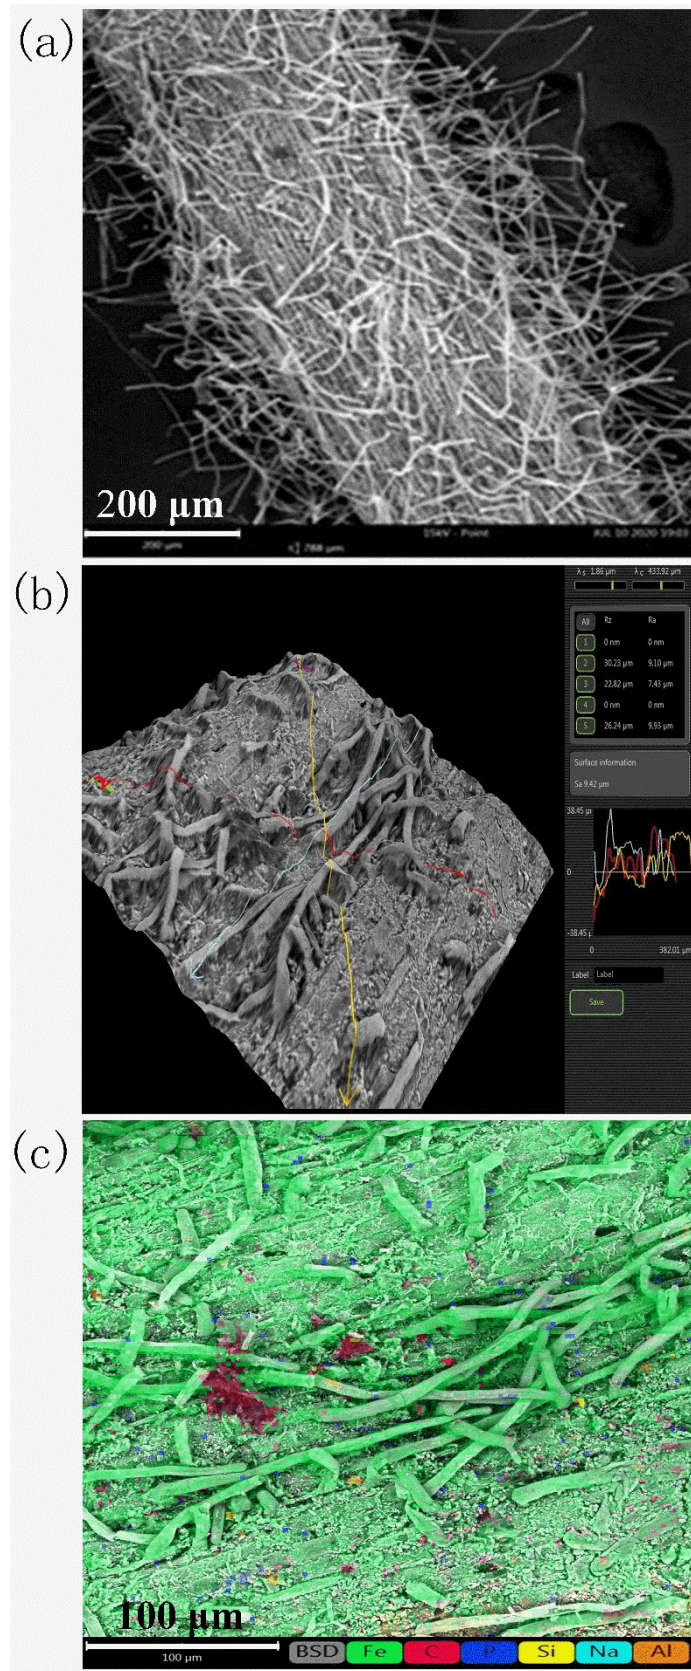

Fig. S5. SEM images and 3D topological mapping with EDS of plaque layer on control

roots. (a) A low magnification backscattered SEM image showing plaque layer of the control roots surrounded by roots hairs and fungi; (b) 3D topological mapping with analysis of height variations of plaque layer; and (c) EDS showing the distribution of the main elements.

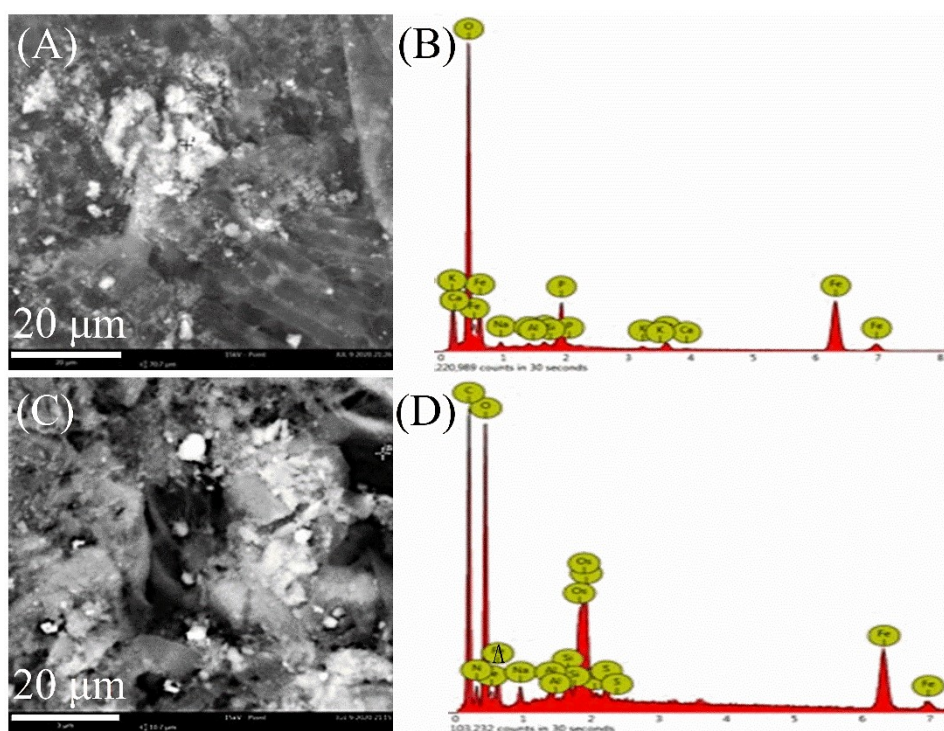

Fig. S6. A) Backscattered SEM image of biochar surface embedded in the plaque layer; B) EDS spectrum showing a significant concentration of different minerals on the surfaces; C) high magnification of the mineralized area in A with osmium and relative high concentration of N and S indicating micro-organisms growing in a biofilm.

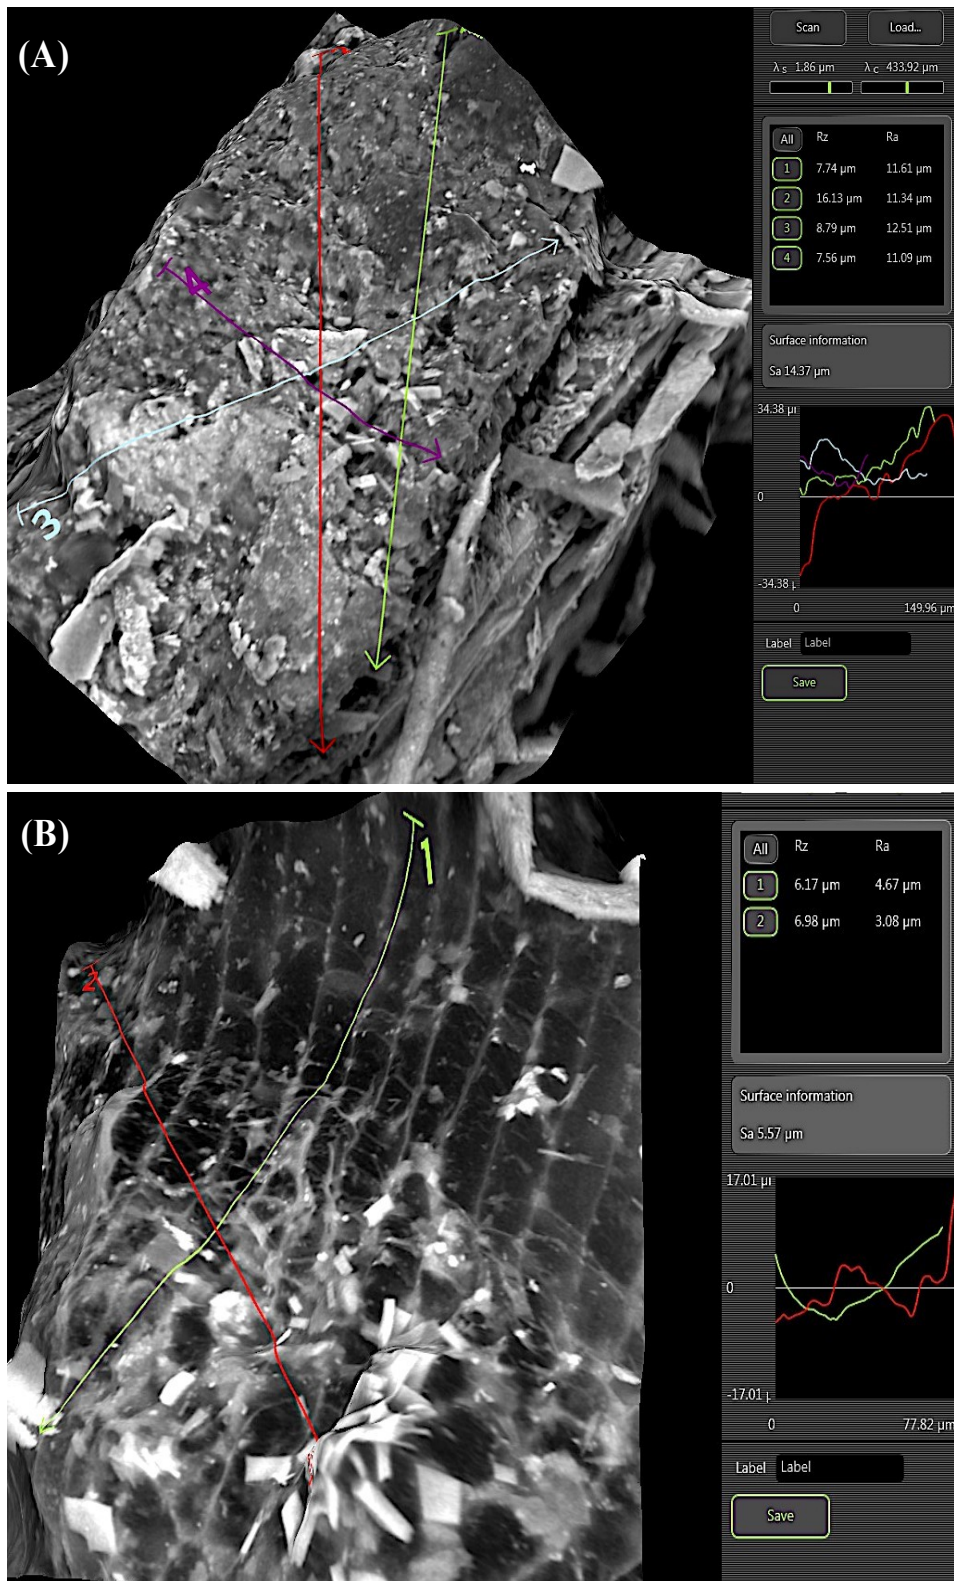

Fig. S7. 3D topographical maps of BC (nano400) surface embedded in the plaque layer (A and B) and high magnification of the BC area in the panel A (C and D).



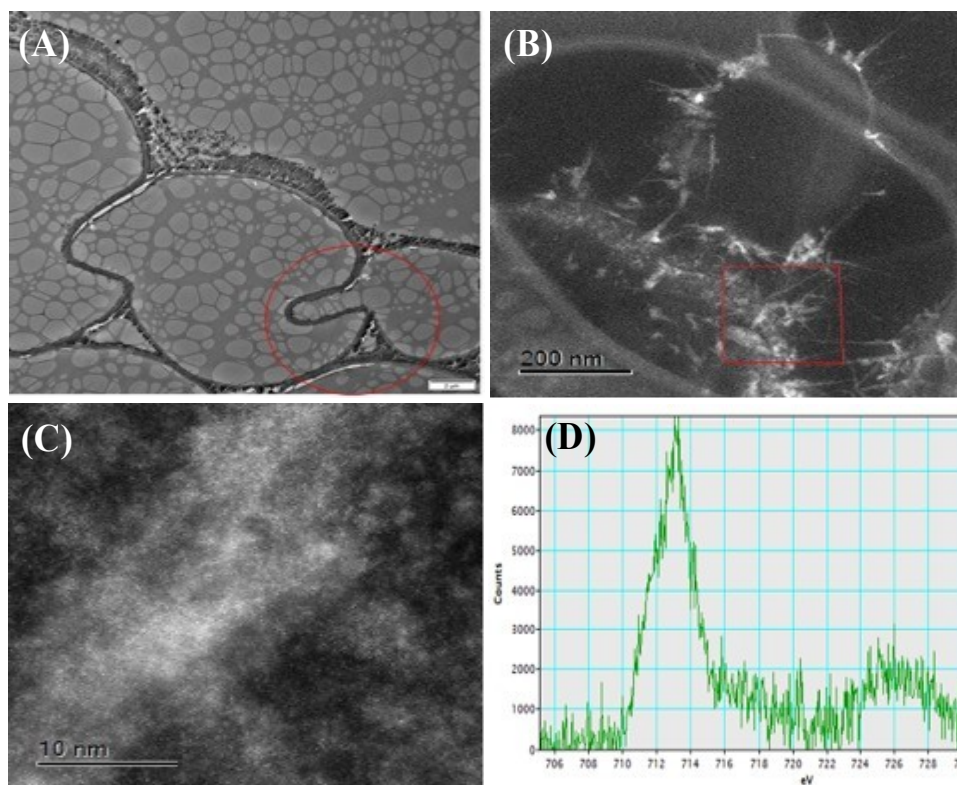

Fig. S8. (A) Bright field images of inside of control roots with an area consisting of iron nanoparticles (B and C) and EELS spectrum (D) indicating the nanoparticles could be magnetite or a mixture of other  $\text{Fe}^{2+}$  and  $\text{Fe}^{3+}$  compounds (possibly goethite or ferrihydrite).

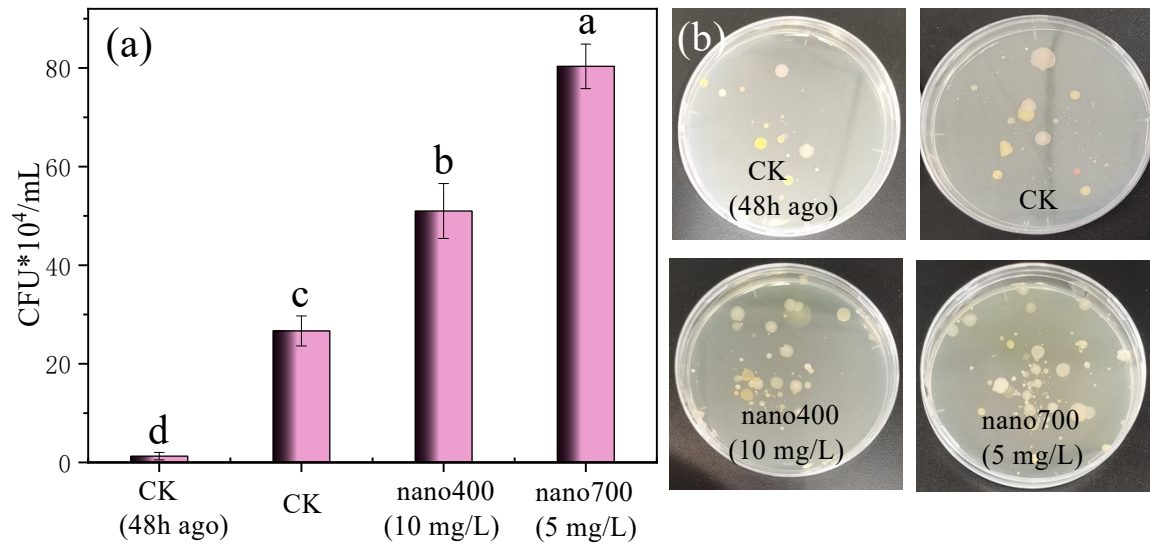

Fig. S9. Results of plate-counting assays for the microorganisms assembled on the iron plaque of rice roots in the presence and absence of nano-BC (nano400 and nano700). The concentrations of microorganisms in the plates (a) and the images of microorganism assemblages for nano-BC treatments and control (b).

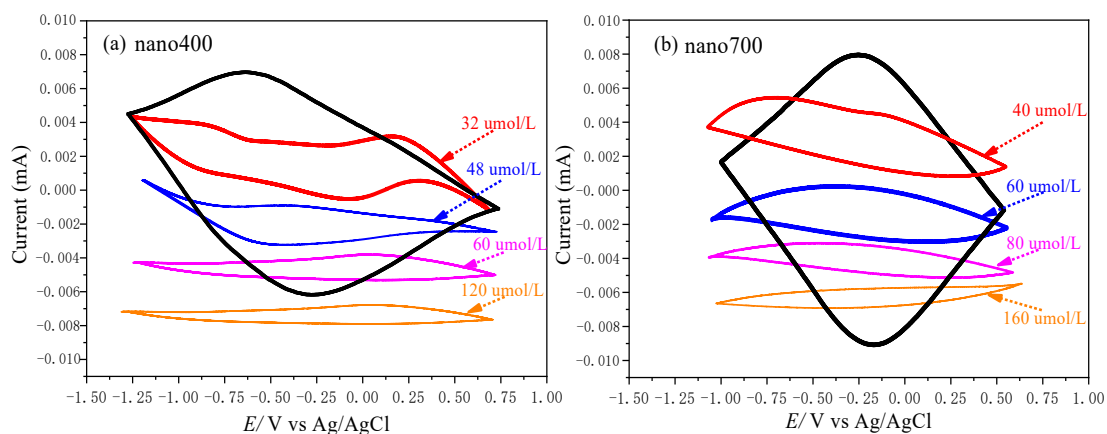

Fig. S10. Voltammetric analyses of nano-BCs (nano400 and nano700) treated by different concentrations of tert-butyl alcohol (TBA).

Table S1. The physiochemical properties of nano-BCs

| BC      | Surface functionalities and atomic content (%) |      |     |      |         |      |     |      |      |      | TOC<br>(mg/L) | $S_{\text{BET}}^{\text{a}}$<br>( $\text{m}^2/\text{g}$ ) | $V_{\text{tot}}^{\text{b}}$<br>( $\text{cm}^3/\text{g}$ ) | $D^{\text{c}}$<br>(nm) |
|---------|------------------------------------------------|------|-----|------|---------|------|-----|------|------|------|---------------|----------------------------------------------------------|-----------------------------------------------------------|------------------------|
|         | C                                              | O    | N   | O/C  | (N+O)/C | Si   | Ca  | C-C  | C-O  | C=O  |               |                                                          |                                                           |                        |
| nano700 | 54.8                                           | 31.5 | 1.6 | 0.57 | 0.60    | 10.8 | 2.0 | 47.1 | 29.4 | 23.5 | 28.29         | 253.9                                                    | 0.58                                                      | 220                    |
| nano400 | 55.0                                           | 32.4 | 2.4 | 0.58 | 0.63    | 8.6  | 1.6 | 45.8 | 24.8 | 29.4 | 14.89         | 93.18                                                    | 0.36                                                      | 280                    |

<sup>a</sup>  $S_{\text{BET}}$  is surface area calculated by the Brunauer-Emmett-Teller (BET) method from adsorption isotherms;

<sup>b</sup>  $V_{\text{tot}}$  is total pore volume measured by nitrogen adsorption–desorption at 77 K using an Autosorb-1 gas analyzer, determined at  $P/P_0=0.99$ ;

<sup>c</sup>  $D$  is the hydrodynamic diameter measured by a dynamic light scattering analyzer at room temperature

Table S2. Composition of the artificial rhizosphere solution used for hydroponic culture of rice seedlings

| Number | Macronutrients                                                  | Concentration (mg/L) |
|--------|-----------------------------------------------------------------|----------------------|
| 1      | Ca(NO <sub>3</sub> ) <sub>2</sub> *4H <sub>2</sub> O            | 10                   |
| 2      | KCl                                                             | 1.2                  |
| 3      | KH <sub>2</sub> PO <sub>4</sub>                                 | 2.5                  |
| 4      | MgSO <sub>4</sub> *7H <sub>2</sub> O                            | 2.5                  |
| Number | micronutrients                                                  | Concentration (µg/L) |
| 1      | KI                                                              | 0.3                  |
| 2      | LiCl                                                            | 0.3                  |
| 3      | CuSO <sub>4</sub> *5H <sub>2</sub> O                            | 0.6                  |
| 4      | ZnSO <sub>4</sub> *7H <sub>2</sub> O                            | 1.1                  |
| 5      | H <sub>3</sub> BO <sub>3</sub>                                  | 0.6                  |
| 6      | Al <sub>2</sub> (SO <sub>4</sub> ) <sub>3</sub>                 | 0.6                  |
| 7      | MnCl <sub>2</sub> *4H <sub>2</sub> O                            | 3.9                  |
| 8      | NiSO <sub>4</sub> *7H <sub>2</sub> O                            | 0.6                  |
| 9      | Co(NO <sub>3</sub> ) <sub>2</sub> *6H <sub>2</sub> O            | 0.6                  |
| 10     | KBr                                                             | 0.3                  |
| 11     | (NH <sub>4</sub> ) <sub>6</sub> Mo <sub>7</sub> O <sub>24</sub> | 0.6                  |

Table S3. The selected nutrient concentrations in the shoots and roots of rice plants cultured in the aqueous suspension of nano-BC (nano400) \*

| Nano-BC<br>(mg/L) | Nutrient concentrations (ug/g) |             |             |            |            |               |             |             |             |              |
|-------------------|--------------------------------|-------------|-------------|------------|------------|---------------|-------------|-------------|-------------|--------------|
|                   | N                              | P           | K           | Ca         | Mg         | Mn            | S           | Cu          | Fe          | Zn           |
| Nano400           | Roots                          |             |             |            |            |               |             |             |             |              |
| 0                 | 2889±67.2c                     | 2541±75.9bc | 4698±96.3c  | 2669±50.3b | 1671±6.46a | 30.82±0.74cd  | 12984±253b  | 91.05±25.0a | 1119±112bc  | 29.94±29.6b  |
| 5                 | 3235±30.4c                     | 2648±288c   | 4841±207bc  | 3143±67.2c | 1851±289a  | 30.03±5.71bcd | 14918±138c  | 125.5±5.10a | 1394±176c   | 35.38±8.94c  |
| 10                | 3971±184d                      | 2888±423c   | 5313±144d   | 3743±22.6d | 1937±68.9a | 36.49±14.0d   | 18054±126d  | 144.1±21.8b | 2618±110d   | 39.73±15.2d  |
| 20                | 1951±236b                      | 2542±285bc  | 4771±150b   | 3245±341c  | 1759±231a  | 27.76±4.89c   | 15690±163b  | 115.8±2.62a | 1074±138ab  | 37.71±1.30c  |
| 40                | 1252±43.9a                     | 2074±84.6ab | 4454±149ab  | 2175±118ab | 1268±51.2a | 22.19±1.02ab  | 10427±129bc | 116.8±12.9a | 930.4±127a  | 21.48±1.78a  |
| 80                | 1167±168a                      | 1757±146a   | 3606±97.9a  | 2011±249a  | 1118±134a  | 17.73±1.13a   | 9837±138a   | 82.9±10.9a  | 919.2±54.5a | 16.00±14.8a  |
| Nano400           | Shoots                         |             |             |            |            |               |             |             |             |              |
| 0                 | 3115±64.5b                     | 9259±68.6a  | 50176±515a  | 8033±687b  | 6904±420a  | 795.3±91.5c   | 4053±38.5a  | 26.61±0.04b | 1142±0.58a  | 106.6±12.3bc |
| 5                 | 3676±177bc                     | 9794±237ab  | 51785±154a  | 8953±281b  | 7776±271a  | 829.5±290c    | 4046±42.4a  | 28.02±6.98b | 1691±261a   | 113.9±32.4c  |
| 10                | 4106±70.7c                     | 11200±136b  | 58047±200b  | 10867±174c | 8940±308a  | 851.0±108c    | 5057±45.2a  | 36.46±1.24c | 1854±204b   | 126.1±6.66c  |
| 20                | 2100±19.9a                     | 9994±78.6ab | 50629±772a  | 8789±616ab | 6792±360a  | 591.9±71.0b   | 4887±518a   | 27.81±2.30b | 1404±183a   | 89.9±3.41ab  |
| 40                | 2045±316a                      | 8618±104ab  | 45543±249ab | 6850±141a  | 5983±68.3a | 539.8±2.78ab  | 4417±641a   | 27.94±0.41b | 1448±438a   | 81.9±8.11a   |
| 80                | 2030±106a                      | 8593±65.3a  | 42496±630a  | 6475±102a  | 5347±105a  | 440.1±31.1a   | 3945±19.3a  | 18.89±8.32a | 1482±129a   | 79.6±10.0a   |

Different letters represent different statistical groups suggested by the Tukey-HSD multiple comparisons at  $P < 0.05$

Table S4. The selected nutrient concentrations in the shoots and roots of rice plants cultured in the aqueous suspension of nano-BC (nano700) \*

| Nano-BC<br>(mg/L) | Nutrient concentrations (ug/g) |             |             |             |              |              |            |              |             |              |
|-------------------|--------------------------------|-------------|-------------|-------------|--------------|--------------|------------|--------------|-------------|--------------|
|                   | N                              | P           | K           | Ca          | Mg           | Mn           | S          | Cu           | Fe          | Zn           |
| Nano700           |                                |             |             |             | Roots        |              |            |              |             |              |
| 0                 | 2889±67.0b                     | 2541±76.0bc | 4698±96.3ab | 2669±50.3a  | 1671±6.46a   | 30.82±0.74ab | 12984±253a | 94.05±25.0ab | 1119±112a   | 29.94±29.6ab |
| 5                 | 3400±305c                      | 2736±1.69b  | 6967±230b   | 3545±236bc  | 2317±129.9ab | 60.15±16.3c  | 10482±564a | 94.95±14.1ab | 2077±67.3b  | 46.34±0.96c  |
| 10                | 2755±140b                      | 2263±355abc | 5734±156ab  | 3395±610ab  | 2425±150ab   | 26.39±1.26a  | 12561±186a | 113.0±3.37b  | 1458±85.1a  | 37.74±4.53b  |
| 20                | 1960±40.5a                     | 1954±328ab  | 3366±260a   | 4260±287c   | 2541±351b    | 38.26±2.50b  | 14453±201a | 94.59±8.67ab | 1260±150a   | 28.09±25.5ab |
| 40                | 1689±353a                      | 1864±319a   | 4102±328ab  | 3558±179bc  | 2411±91.0ab  | 38.83±5.82b  | 13650±243a | 93.94±18.0ab | 1203±276a   | 24.84±9.65a  |
| 80                | 1460±427a                      | 1844±199a   | 2994±399a   | 3445±338bc  | 2249±289ab   | 37.73±0.19b  | 13936±164a | 79.95±4.55a  | 1164±112a   | 27.81±27.2ab |
| Nano700           |                                |             |             |             | Shoots       |              |            |              |             |              |
| 0                 | 3115±64.5b                     | 9259±68.6b  | 50176±515b  | 8033±687b   | 6904±419b    | 795.3±91.5b  | 4553±38.5a | 26.61±0.04a  | 1142±0.58b  | 106.6±12.3bc |
| 5                 | 4005±179c                      | 13086±296c  | 91811±475c  | 15035±636d  | 8340±446c    | 1013±414c    | 6626±97.3a | 38.10±4.78c  | 1740±93.4c  | 116.6±40.8c  |
| 10                | 3191±35.9b                     | 11030±895b  | 58922±138bc | 10840±378c  | 7213±79.3bc  | 759.1±52.7b  | 5127±38.0a | 30.52±2.31b  | 1673±185c   | 103.6±1.65bc |
| 20                | 2017±7.66a                     | 8379±615b   | 65589±143bc | 10927±275bc | 6424±165a    | 812.1±355b   | 5544±302a  | 27.14±3.78ab | 1008±15.8ab | 92.31±17.1ab |
| 40                | 2023±92.1a                     | 6611±97.0a  | 41157±106a  | 6003±62.2a  | 5648±33.5a   | 334.0±1.68a  | 3856±705a  | 30.56±4.85b  | 940±81.7a   | 86.97±2.64a  |
| 80                | 1821±64.0a                     | 5641±88.8a  | 41628±264a  | 5961±149a   | 5664±243c    | 303.2±12.2a  | 4126±158a  | 27.09±9.44ab | 912±158ab   | 72.76±10.5a  |

\* Different letters represent different statistical groups suggested by the Tukey-HSD multiple comparisons at  $P < 0.0$
